# Supplementary material for: A longitudinal study of well-being, confidence and competence in junior doctors and the impact of emergency medicine placements
Source: HighWire-hosted journal article supplement (doi:10.1136/emermed-2014-204514), 2015-09-03

**Appendix 1: Schematic of current Postgraduate training in the UK including Foundation Training.**

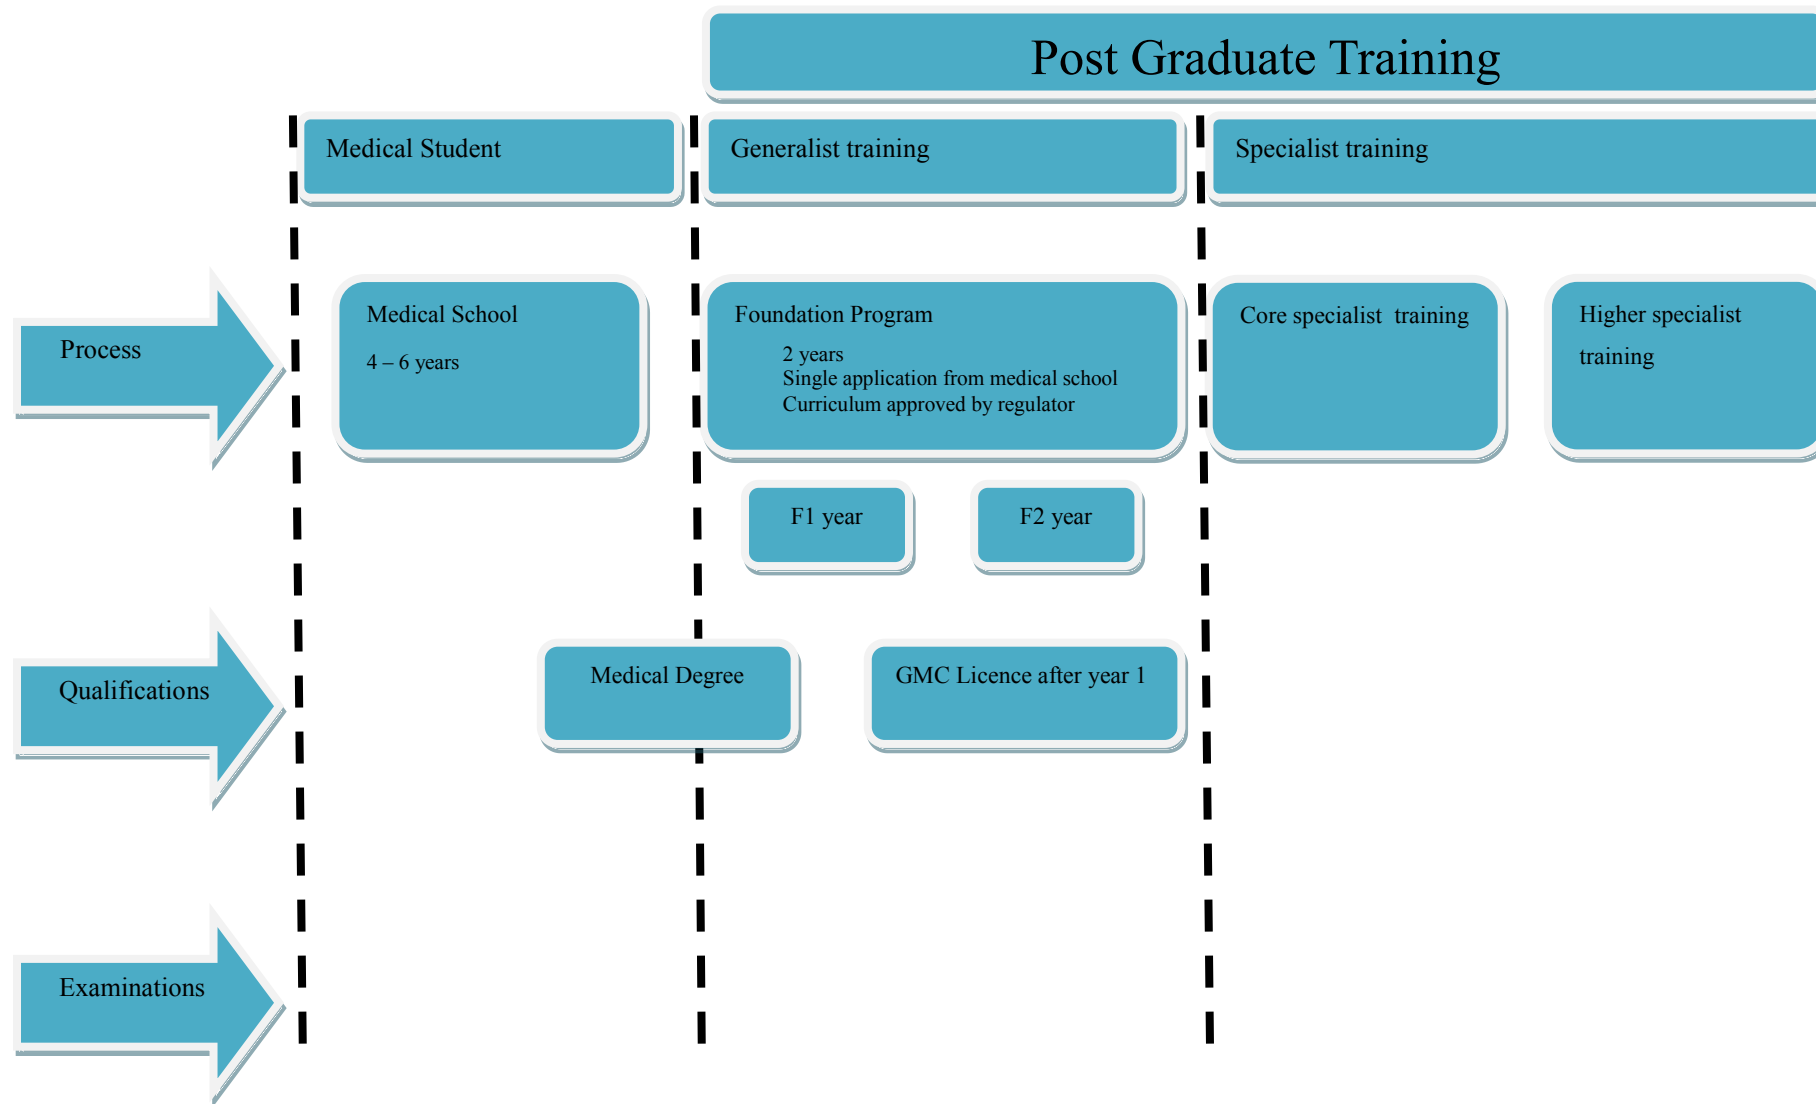

Supplement: emermed-2014-204514supp.pdf [file emermed-2014-204514supp.pdf]
